# Supplementary material for: Synthesis of an Electrodeficient Dipyridylbenzene-like Terdentate Ligand: Cyclometallating Ligand for Highly Emitting Iridium(III) and Platinum(II) Complexes
Source: MDPI journal article supplement (doi:10.3390/org4030029), 2023-07-14
Supplement: s1 [file s1]

# Synthesis of an electrodeficient dipyridylbenzene-like terden-tate ligand: cyclometallating ligand for highly emitting iridi-um(III) and platinum(II) complexes.

Pierre-Henri Lanoë\*, Christian Philouze, and Frédérique Loiseau\*

Univ. Grenoble Alpes, CNRS, DCM, 38000 Grenoble, France

## Crystal Structures Determinations and Refinements.

Single crystals of compounds compound **8**, were picked up from the mother liquor, coated with a parafin mixture, collected with nylon loops and mounted on goniometer heads. Measurements were made at 200 K on a Enraf-Nonius 4 circles kappa goniometer equipped with an Incoatec high brilliance microsource with Montel optics monochromated Mo-K $\alpha$  radiation ( $\lambda = 0.71073$  Å). The detector was a Bruker APEXII and an Oxford Cryosystem cryostream cooler was used. The crystal data and details of the data collections are given in Error! Reference source not found.. The data were integrated and corrected for Lorentz and polarization effects using Eval14<sup>1</sup>, corrected for absorption using SADABS<sup>2</sup> and finally merged using Xprep<sup>3</sup>. Crystallographic structures were solved using direct methods implemented by Superflip.<sup>4</sup> Refinement was performed using ShelXL-2013<sup>5</sup> run under Olex2<sup>6</sup>. C, Cl, F, Ir, N, O, and Br atoms were refined anisotropically by the full matrix least-squares method on F<sup>2</sup>. H atoms were set geometrically.

Supplementary data is available on request from the CCDC, 12 Union Road, Cambridge CB2 1EZ, UK, quoting the deposition number CCDC- 2252294. These data can be obtained free of charge at [www.ccdc.cam.ac.uk/conts/retrieving.html](http://www.ccdc.cam.ac.uk/conts/retrieving.html) or fax: +44-1223/336-033; E-mail: [deposit@ccdc.cam.ac.uk](mailto:deposit@ccdc.cam.ac.uk)].

---

<sup>1</sup> Duisenberg, A. J. M., Kroon-Batenburg, L. M. J. & Schreurs, A. M. M. (2003). *J. Appl. Cryst.* **36**, 220-229.

<sup>2</sup> Bruker (2004). *SADABS*. Bruker AXS Inc., Madison, Wisconsin, USA.

<sup>3</sup> Bruker (2005). *XPREF*. Bruker AXS Inc., Madison, Wisconsin, USA.

<sup>4</sup> Palatinus, L. & Chapuis, G. (2007). *J. Appl. Cryst.* **40**, 786-790.

<sup>5</sup> Sheldrick, G. M. (2015). *Acta Cryst.* **C71**, 3-8.

<sup>6</sup> Dolomanov, O.V., Bourhis, L.J., Gildea, R.J., Howard, J.A.K. & Puschmann, H. (2009), *J. Appl. Cryst.* **42**, 339-341

Table S 1 : Crystal data and structure refinement.

| Compound                                                 | <b>8</b>                                                                                                                          |
|----------------------------------------------------------|-----------------------------------------------------------------------------------------------------------------------------------|
| Formula                                                  | C <sub>29</sub> H <sub>24</sub> ClIrN <sub>4</sub> . 0.5(C <sub>2</sub> H <sub>4</sub> Cl <sub>2</sub> ). 1.64(CH <sub>4</sub> O) |
| $F_w$                                                    | 758.24                                                                                                                            |
| $T$ [K]                                                  | 200                                                                                                                               |
| Morphology                                               | needle                                                                                                                            |
| Color                                                    | yellow                                                                                                                            |
| Crystal size [mm]                                        | 0.04 x 0.09 x 0.4                                                                                                                 |
| Crystal system                                           | triclinic                                                                                                                         |
| Space group                                              | P -1                                                                                                                              |
| $a$ [Å]                                                  | 8.8948(18)                                                                                                                        |
| $b$ [Å]                                                  | 13.069(3)                                                                                                                         |
| $c$ [Å]                                                  | 16.615(3)                                                                                                                         |
| $\alpha$ [°]                                             | 105.07(3)                                                                                                                         |
| $\beta$ [°]                                              | 104.99(3)                                                                                                                         |
| $\gamma$ [°]                                             | 98.81(3)                                                                                                                          |
| Unit-cell volume [Å <sup>3</sup> ]                       | 1750.5(7)                                                                                                                         |
| $Z$                                                      | 2                                                                                                                                 |
| $D_x$ [g·cm <sup>-3</sup> ]                              | 1.439                                                                                                                             |
| $\mu$ [mm <sup>-1</sup> ]                                | 3.996                                                                                                                             |
| Radiation [Å]                                            | MoK $\alpha$ ( $\lambda$ = 0.71073)                                                                                               |
| $\Theta$ range for data collection/°                     | 1.340 to 27.500                                                                                                                   |
| Index ranges                                             | -11 $\leq h \leq$ 11, -16 $\leq k \leq$ 16,<br>-21 $\leq l \leq$ 21                                                               |
| Total reflections                                        | 40254                                                                                                                             |
| Unique reflections                                       | 7967                                                                                                                              |
| Used reflections<br>( $I > 3\sigma(I)$ )                 | 6867                                                                                                                              |
| Refined parameters                                       | 422                                                                                                                               |
| $R_{int.}$                                               | 0.0487                                                                                                                            |
| $R^a$                                                    | 0.0358                                                                                                                            |
| $R(w)$                                                   | 0.0877                                                                                                                            |
| Goodness of fit                                          | 2.02                                                                                                                              |
| $\Delta\rho_{min}/\Delta\rho_{max}$ (e·Å <sup>-3</sup> ) | -0.84/1.13                                                                                                                        |

# NMR spectra

PH-18-24brut.3.fid  
@PROTON DMSO /opt/topspin cir 7

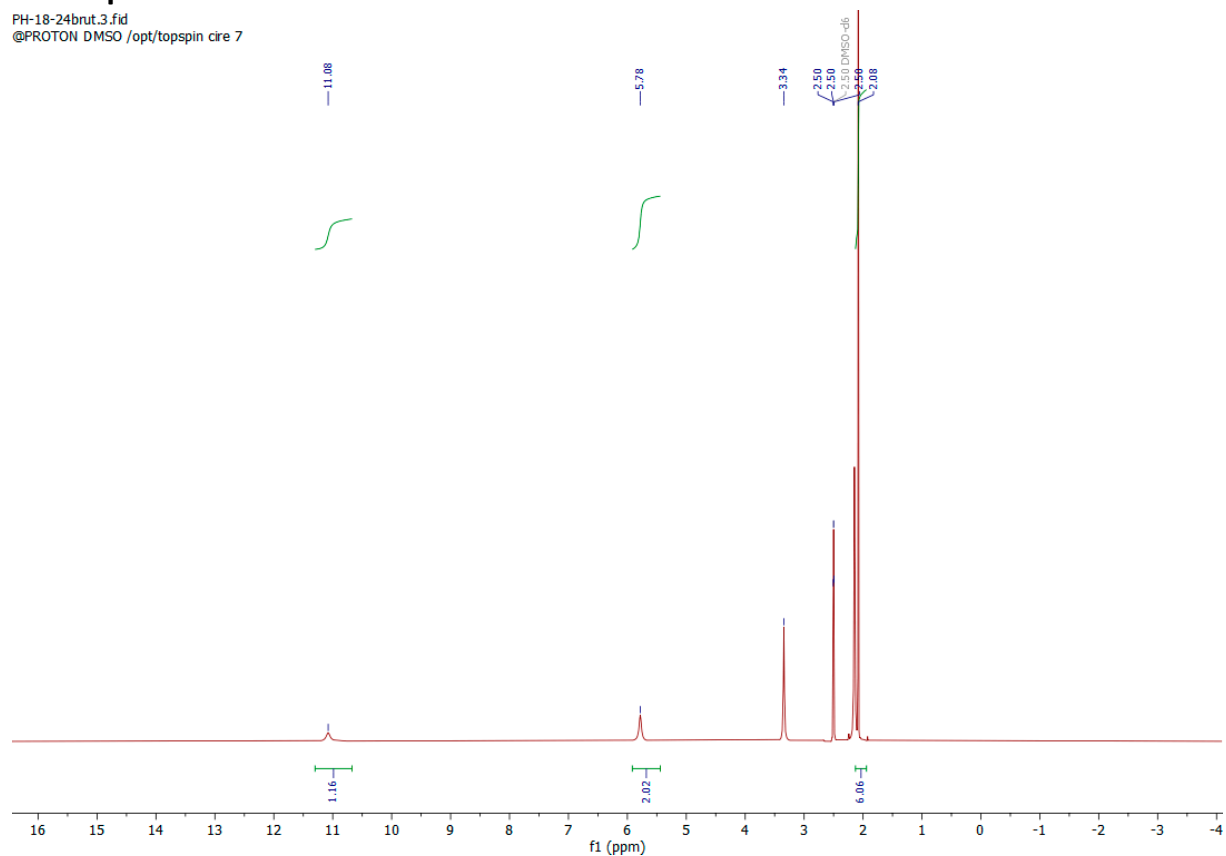

Figure S 1 :  $^1\text{H}$  NMR Compound 1 in DMSO, 400 MHz

PH-18-26-IL1.fid  
@PROTON CDCl<sub>3</sub> /opt/topspin circ 41

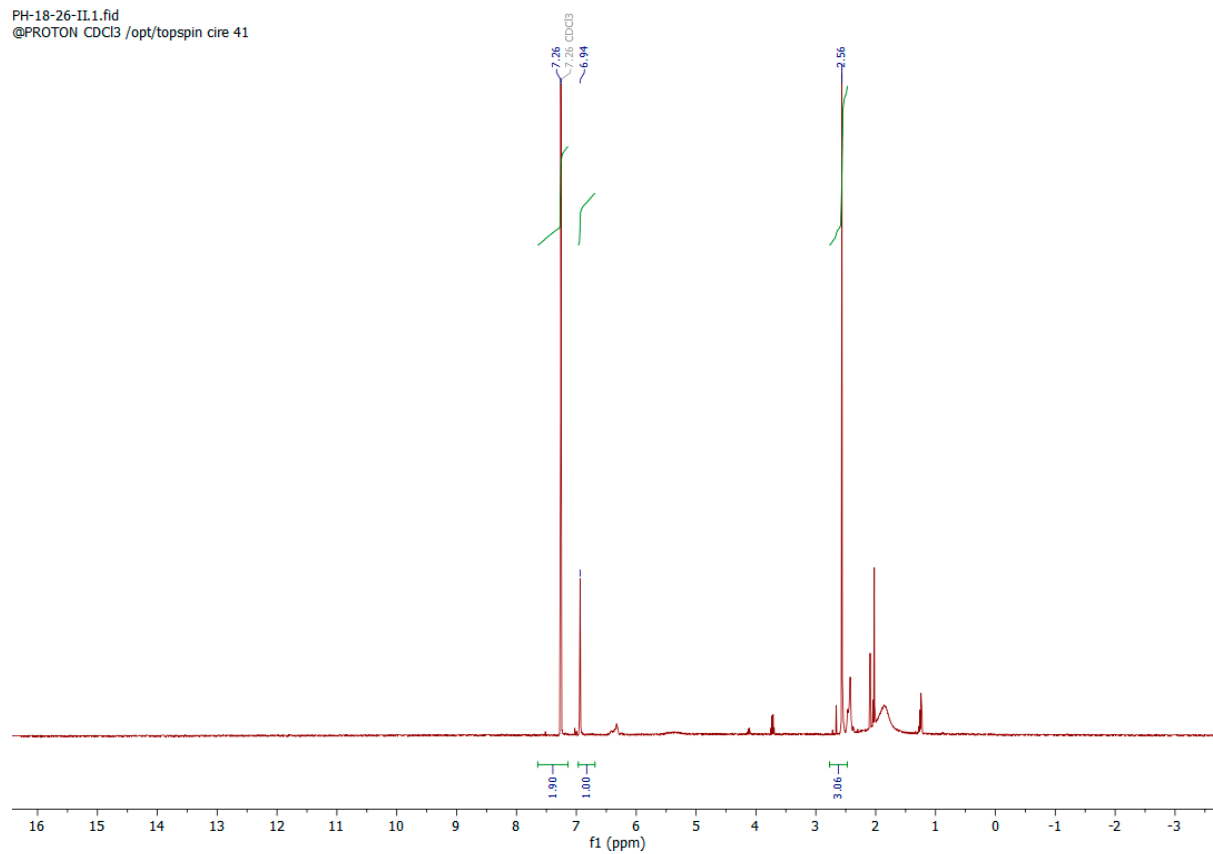

Figure S 2 : <sup>1</sup>H NMR Compound **2** in CDCl<sub>3</sub>, 400 MHz

PH-18-36-brut.1.fid  
@PROTON CDCl<sub>3</sub> /opt/topspin circ 21

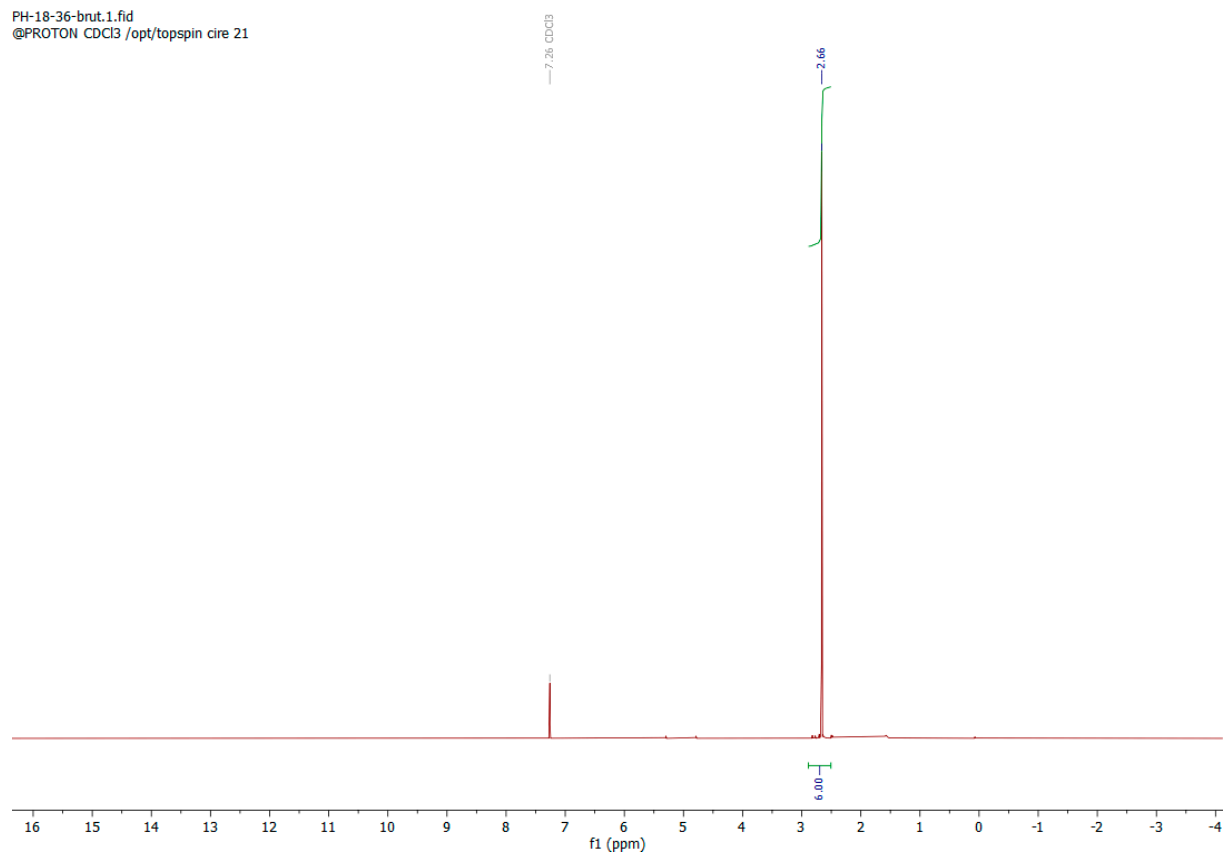

Figure S 3 : <sup>1</sup>H NMR Compound **3** in CDCl<sub>3</sub>, 400 MHz

PH-18-37.1.fid  
 @PROTON CDCl3 /opt/topspin circ 30

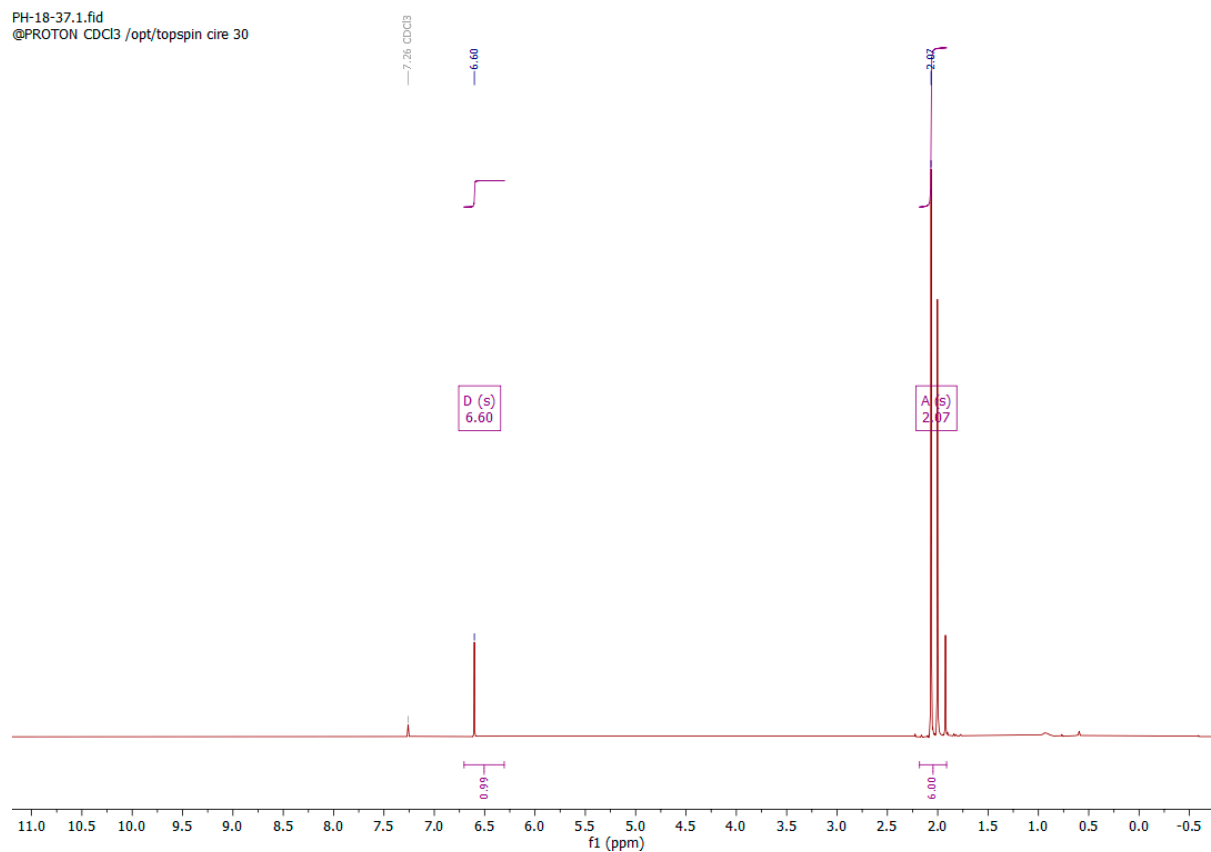

Figure S 4 : <sup>1</sup>H NMR Compound 4 in CDCl<sub>3</sub>, 400 MHz

PH-1912.1.fid  
 @PROTON CDCl3 /opt/topspin circ 51

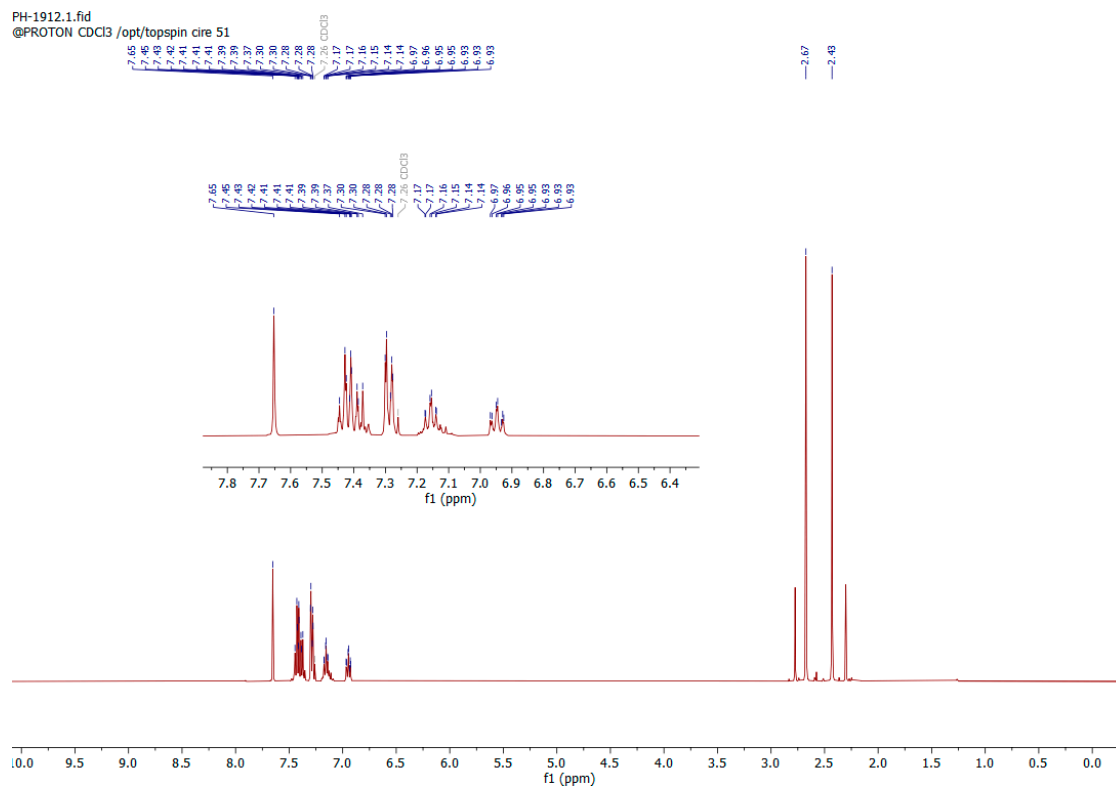

Figure S 5 <sup>1</sup>H NMR Compound 5 in CDCl<sub>3</sub>, 400 MHz



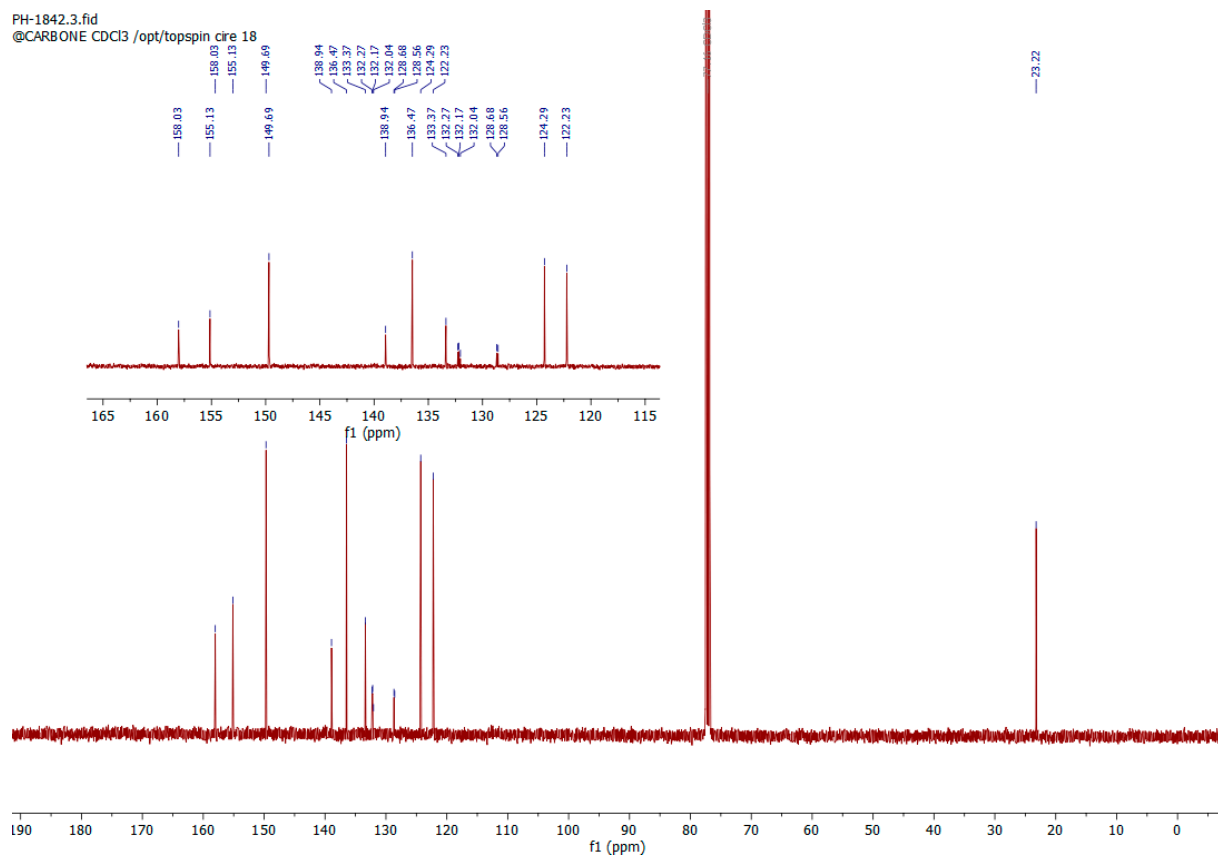

Figure S 8 : <sup>13</sup>C NMR compound **6** in CDCl<sub>3</sub>, 101 MHz

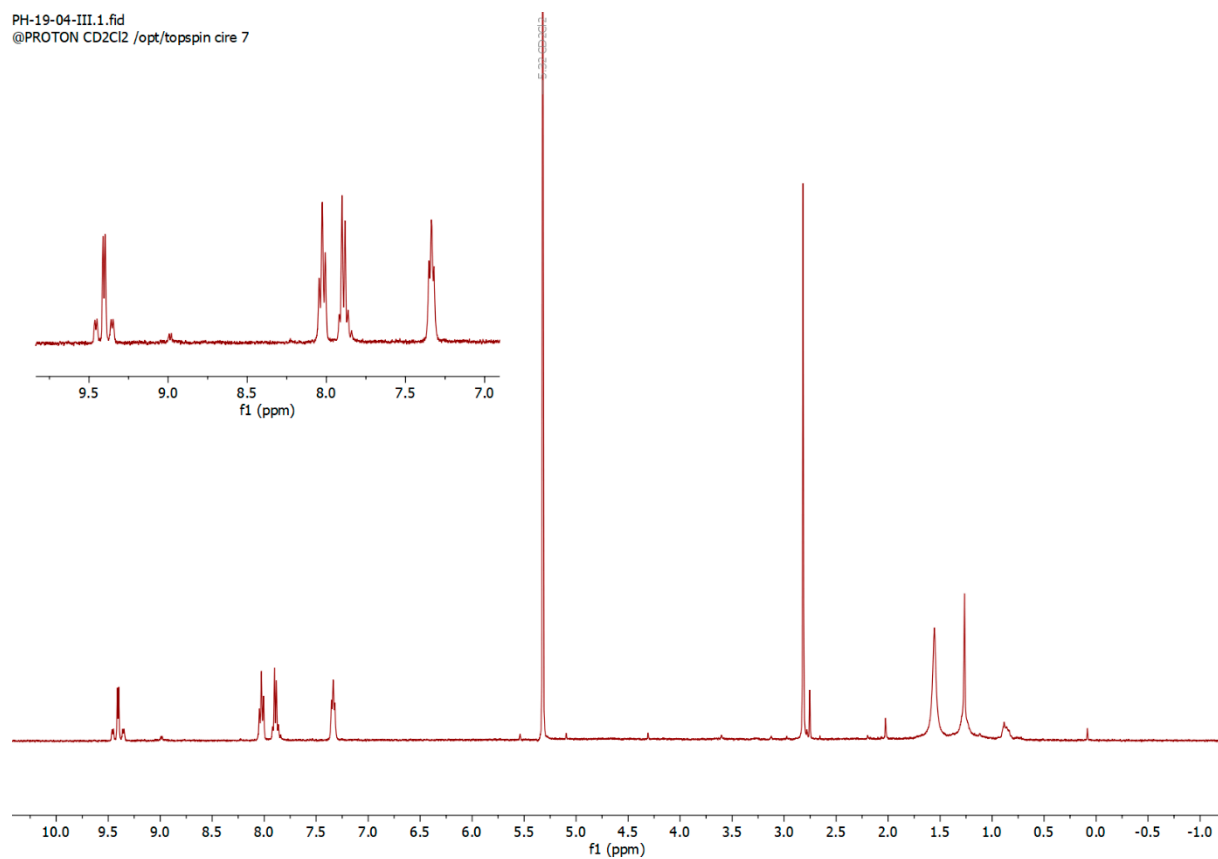

Figure S 9 : <sup>1</sup>H NMR complex **7** in CD<sub>2</sub>Cl<sub>2</sub> 400 MHz

PH-2006.1.fid  
@PROTON CD2Cl2 /opt/topspin cire 1

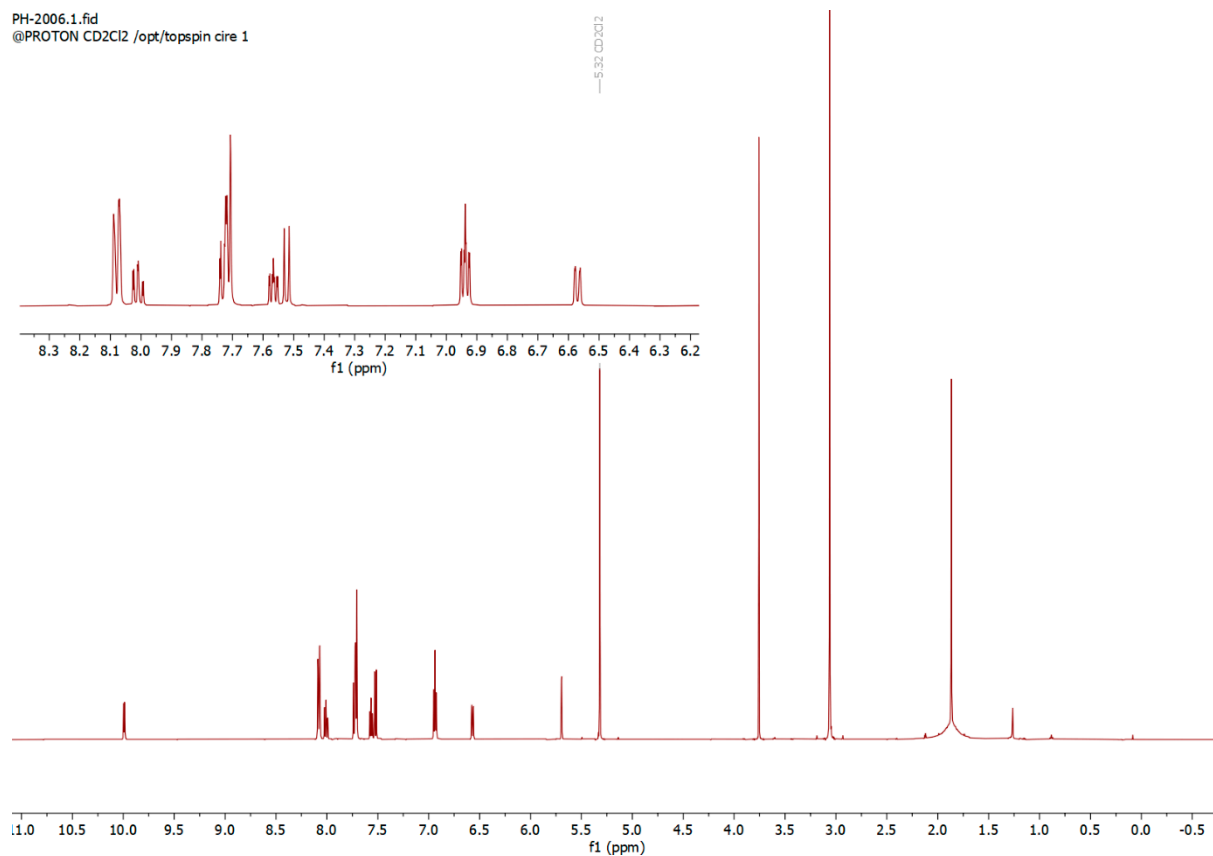

Figure S 10 :  $^1\text{H}$  NMR complex **8** in  $\text{CD}_2\text{Cl}_2$  500 MHz

PH-2006.2.fid  
@CARBONE CD2Cl2 /opt/topspin cire 1

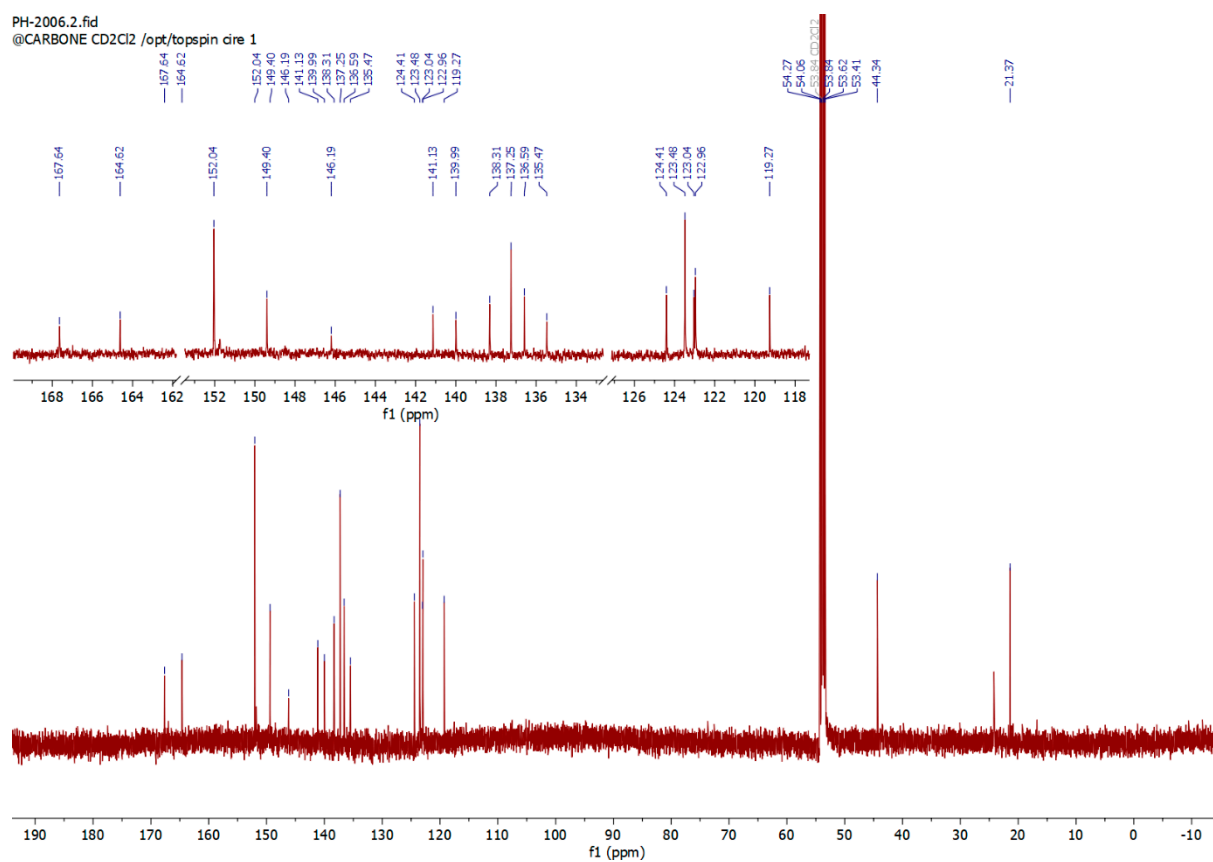

Figure S 11 :  $^{13}\text{C}$  complex **8** complex **8** in  $\text{CD}_2\text{Cl}_2$  126 MHz

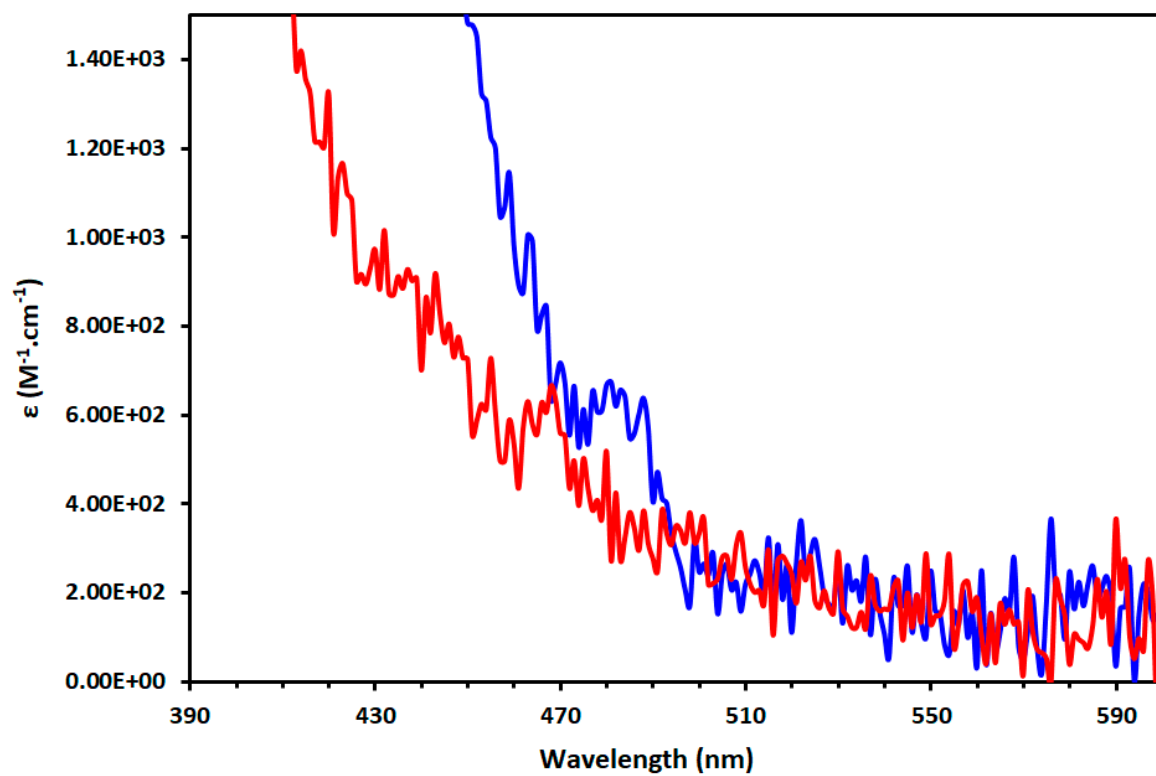

Figure S 12 : Absorption spectra of compounds **7** (blue) and **8** (red) in  $\text{CH}_2\text{Cl}_2$  at R.T. displaying the absorption band of the spin forbidden  $^1\text{MLCT} \rightarrow ^3\text{MLCT}$ .
