# Supplementary material for: Synthesis of an Electrodeficient Dipyridylbenzene-like Terdentate Ligand: Cyclometallating Ligand for Highly Emitting Iridium(III) and Platinum(II) Complexes
Source: MDPI journal article supplement (doi:10.3390/org4030029), 2023-07-14
Supplement: s1 [file s1]

Archive with 1 entries (1 files):
- organics-2404014-supplementary.pdf
